# Supplementary material
Source: MDPI journal article supplement (https://www.mdpi.com/2076-3263/6/1/15)
Supplement: s1 [file s1]

Supplementary Materials: Stratigraphic Changes in the Pliocene Carnivoran Assemblage from Hagerman Fossil Beds National Monument, Idaho

Dennis R. Ruez, Jr.

**List S1.** Specimen list.

| **Inst.** | **Loc. No.** | **Spec. No.** | **Elev.** | **Taxon** | **Element** |
| --- | --- | --- | --- | --- | --- |
| HAFO |  | 266 | 1011 | *Borophagus hilli* | dentary, l; with c1, p4-m1 |
| HAFO | 1 | 831 | 1005 | *Borophagus hilli* | second metacarpal, r; proximal half |
| IMNH | 13 | 70021/34876 | 931 | *Borophagus hilli* | phalanx, proximal |
| UMMP | 49 | 54660 | 960 | *Borophagus hilli* | C1, l |
| USNM | 1 | 24931 | 1005 | *Borophagus hilli* | dP4, l |
| UMMP | 256 | 55963 | 975 | *Buisnictis breviramus* | p4-m1, r |
| UMMP | 1 | 56026 | 1005 | *Buisnictis breviramus* | m1 |
| HAFO |  | 107 | 929 | *Canis lepophagus* | p3, l |
| HAFO |  | 109 | 929 | *Canis lepophagus* | M2, r |
| HAFO | 7 | 286 | 1001 | *Canis lepophagus* | second metatarsal, r |
| HAFO | 7 | 1092 | 1001 | *Canis lepophagus* | frontals and parietals; fused |
| HAFO | 109 | 3907 | 905 | *Canis lepophagus* | phalanx, proximal |
| HAFO | 145 | 4925 | 921 | *Canis lepophagus* | dentary, r; with m2 |
| HAFO | 220 | 6379 | 955 | *Canis lepophagus* | metacarpal |
| IMNH | 4 | 67002/4937 | 916 | *Canis lepophagus* | dentary, r; with m2 |
| IMNH | 4 | 67002/4938 | 916 | *Canis lepophagus* | m1, l |
| IMNH | 29 | 70037/6825 | 943 | *Canis lepophagus* | metacarpal |
| IMNH | 59 | 70037/6826 | 913 | *Canis lepophagus* | dentary, r; with m1 |
| IMNH | 367 | 85005/9967 | 922 | *Canis lepophagus* | entocuneiform |
| IMNH | 79 | 83013/32930 | 937 | *Canis lepophagus* | metacarpal |
| UMMP | 343 | 45222 | 945 | *Canis lepophagus* | dentary, l; with p3-4, twinned p2 |
| UMMP | 4 | 49560 | 916 | *Canis lepophagus* | fifth metacarpal, r |
| UMMP | 20 | 50000 | 930 | *Canis lepophagus* | M1, l |
| UMMP | 20 | 50008 | 930 | *Canis lepophagus* | p3, r |
| UMMP | 117 | 50249 | 918 | *Canis lepophagus* | m2, r |
| UMMP | 3 | 50335 | 912 | *Canis lepophagus* | calcaneum, r |
| UMMP | 128 | 51052 | 937 | *Canis lepophagus* | p3, r |
| UMMP | 3 | 52280 | 912 | *Canis lepophagus* | P4-M2, l |
| UMMP | 5 | 52757 | 1004 | *Canis lepophagus* | m1, r; partial |
| UMMP | 236 | 53452 | 990 | *Canis lepophagus* | m2, l |
| UMMP | 274 | 53519 | 948 | *Canis lepophagus* | dentary, r; edentulous |
| UMMP | 21 | 53817 | 921 | *Canis lepophagus* | p4, l |
| UMMP | 51 | 53910 | 972 | *Canis lepophagus* | dentaries, r and l |
| UMMP | 188 | 54995 | 887 | *Canis lepophagus* | P4, r |
| UMMP | 309 | 56282 | 941 | *Canis lepophagus* | m2, r |
| UMMP |  | 56401 | 974 | *Canis lepophagus* | P4-M2 |
| UMMP | 7 | 56809 | 1001 | *Canis lepophagus* | p2, r |
| UMMP | 331 | 57016 | 1006 | *Canis lepophagus* | M1, partial |
| UMMP | 153 | 49941 | 975 | *Ferinestrix vorax* | femur, l |
| UMMP | 63 | 53343 | 1001 | *Ferinestrix vorax* | dentary, r; with p4-m2 |
| HAFO | 49 | 4973 | 960 | *Homotherium* sp. | metapodial, distal half |
| UMMP | 21 | 56815 | 921 | *Megantereon hesperus* | p4, r |
| HAFO | 68 | 154 | 923 | *Mustela rexroadensis* | dentary, r; with m1 |
| HAFO | 7 | 6459 | 1001 | *Mustela rexroadensis* | humerus, l; distal end |
| IMNH | 13 | 70021/34873 | 931 | *Mustela rexroadensis* | canine |
| UMMP | 4 | 50089 | 916 | *Mustela rexroadensis* | p4-m3, l |
| UMMP | 270 | 54908 | 932 | *Mustela rexroadensis* | m1, l |
| UMMP | 2707 | 55950 | 1001 | *Mustela rexroadensis* | P4, l |
| USNM | 73 | 21824 | 912 | *Mustela rexroadensis* | p3-m3, l |
| HAFO |  | 95 | 929 | *P. lacustris/L. rexroadensis* | calcaneum, r |
| HAFO | 274 | 274 | 1001 | *P. lacustris/L. rexroadensis* | pelvis fragment |
| HAFO | 220 | 1200 | 955 | *P. lacustris/L. rexroadensis* | radius, r; distal end |
| HAFO | 7 | 2295 | 1001 | *P. lacustris/L. rexroadensis* | cuboid, r |
| HAFO | 20 | 2524 | 930 | *P. lacustris/L. rexroadensis* | MP |
| HAFO |  | 4845 | 903 | *P. lacustris/L. rexroadensis* | dentary, l; with c-m1 |
| HAFO | 390 | 4891 | 948 | *P. lacustris/L. rexroadensis* | second metatarsal, l |
| HAFO | 345 | 4923 | 948 | *P. lacustris/L. rexroadensis* | calcaneum, r |
| HAFO |  | 4928 | 939 | *P. lacustris/L. rexroadensis* | calcaneum, l |
| HAFO | 49 | 4972 | 960 | *P. lacustris/L. rexroadensis* | calcaneum, l; partial |
| HAFO | 314 | 5019 | 919 | *P. lacustris/L. rexroadensis* | lumbar |
| HAFO | 25 | 8563 | 915 | *P. lacustris/L. rexroadensis* | second metatarsal, l; proximal end |
| IMNH | 75 | 81002/34836 | 942 | *P. lacustris/L. rexroadensis* | cervical |
| IMNH | 47 | 70055/35165 | 945 | *P. lacustris/L. rexroadensis* | tibia |
| IMNH | 47 | 70055/35166 | 945 | *P. lacustris/L. rexroadensis* | metacarpal |
| IMNH | 7 | 69008/37840 | 1001 | *P. lacustris/L. rexroadensis* | femur |
| IMNH |  | 85032/38171 | 916 | *P. lacustris/L. rexroadensis* | acetabulum |
| UMMP | 355 | 34128 | 950 | *P. lacustris/L. rexroadensis* | P4, r |
| UMMP | 143 | 48929 | 938 | *P. lacustris/L. rexroadensis* | dentary, l; anterior portion, edentulous |
| UMMP | 157 | 48950 | 998 | *P. lacustris/L. rexroadensis* | p4-m1, r |
| UMMP | 3 | 50160 | 912 | *P. lacustris/L. rexroadensis* | ulna, r |
| UMMP | 3 | 50161 | 912 | *P. lacustris/L. rexroadensis* | ulna, r |
| UMMP | 3 | 50194 | 912 | *P. lacustris/L. rexroadensis* | tibia, r |
| UMMP |  | 50199 | 921 | *P. lacustris/L. rexroadensis* | ulnae, r and l |
| UMMP | 108 | 50203 | 910 | *P. lacustris/L. rexroadensis* | tibia (distal), calcaneum, astragalus, and cuboid, l; associated |
| UMMP | 3 | 50227 | 912 | *P. lacustris/L. rexroadensis* | 2m1s, partial; p3 |
| UMMP | 104 | 50252 | 900 | *P. lacustris/L. rexroadensis* | ulna, l; proximal end |
| UMMP | 3 | 50336 | 912 | *P. lacustris/L. rexroadensis* | ectocuneiform, l |
| UMMP | 101 | 50595 | 926 | *P. lacustris/L. rexroadensis* | third metacarpal, l |
| UMMP | 218 | 53530 | 953 | *P. lacustris/L. rexroadensis* | calcaneum, r |
| UMMP | 100 | 53684 | 963 | *P. lacustris/L. rexroadensis* | P4, r; partial |
| UMMP | 220 | 53712 | 955 | *P. lacustris/L. rexroadensis* | third and fourth metatarsal, r |
| UMMP | 284 | 53738 | 940 | *P. lacustris/L. rexroadensis* | third metatarsal, l |
| UMMP | 316 | 55516 | 936 | *P. lacustris/L. rexroadensis* | fourth metatarsal, r |
| UMMP | 238 | 55889 | 998 | *P. lacustris/L. rexroadensis* | radius, l |
| UMMP | 306 | 55894 | 950 | *P. lacustris/L. rexroadensis* | P4, r |
| UMMP | 314 | 55943 | 919 | *P. lacustris/L. rexroadensis* | calcaneum and astragalus, r |
| UMMP | 314 | 55944 | 919 | *P. lacustris/L. rexroadensis* | third metatarsal, r |
| UMMP | 215 | 56085 | 937 | *P. lacustris/L. rexroadensis* | ulna, l; proximal end |
| UMMP | 3 | 56392 | 912 | *P. lacustris/L. rexroadensis* | humerus, r; distal end |
| UMMP | 51 | 56806 | 972 | *P. lacustris/L. rexroadensis* | p4, l; and fourth metacarpal, l |
| HAFO | 68 | 275 | 1001 | *Satherium piscinarium* | humerus, l; missing distal end |
| HAFO | 7 | 392 | 980 | *Satherium piscinarium* | dentary, r; condyle and coronoid |
| HAFO | 7 | 2412 | 1001 | *Satherium piscinarium* | femur, r |
| HAFO |  | 3665 | 928 | *Satherium piscinarium* | dentary, r; with c1-m1 |
| HAFO | 214 | 4515 | 938 | *Satherium piscinarium* | radius, l; missing distal end |
| HAFO | 381 | 4519 | 945 | *Satherium piscinarium* | femur, r; proximal end |
| HAFO |  | 4893 | 961 | *Satherium piscinarium* | dentary, r; edentulous |
| HAFO | 445 | 4927 | 963 | *Satherium piscinarium* | calcaneum, l |
| HAFO | 3 | 4930 | 912 | *Satherium piscinarium* | dentary, l; with p4-m2 |
| HAFO | 507 | 5303 | 942 | *Satherium piscinarium* | caudal, neural arch |
| HAFO | 507 | 5304 | 942 | *Satherium piscinarium* | humerus, r; distal shaft |
| HAFO |  | 5945 | 917 | *Satherium piscinarium* | dentary, r; with alveolus for c, p4, m1 |
| HAFO | 518 | 6013 | 900 | *Satherium piscinarium* | phalanx, proximal |
| HAFO | 220 | 6380 | 955 | *Satherium piscinarium* | dentary, l; edentulous |
| HAFO | 539 | 6613 | 914 | *Satherium piscinarium* | metatarsal |
| HAFO | 7 | 7578 | 1001 | *Satherium piscinarium* | radius, l; proximal end |
| HAFO | 482 | 7810 | 926 | *Satherium piscinarium* | humerus, r; distal half |
| IMNH | 10 | 70018/4935 | 970 | *Satherium piscinarium* | dentary, l; with p3-4 |
| IMNH | 4 | 67002/4939 | 916 | *Satherium piscinarium* | dentary, r; edentulous |
| IMNH | 68 | 80005/5380 | 923 | *Satherium piscinarium* | maxilla, r; with P4-M1 |
| IMNH | 1 | 31001/7941 | 1005 | *Satherium piscinarium* | dentary, r; edentulous |
| IMNH | 4 | 67002/34548 | 916 | *Satherium piscinarium* | dentary, l; edentulous |
| IMNH | 23 | 70031/35149 | 911 | *Satherium piscinarium* | humerus, r; distal end |
| IMNH |  | 85032/38183 | 916 | *Satherium piscinarium* | dentary, r; edentulous |
| IMNH | 367 | 85005/38645 | 922 | *Satherium piscinarium* | m1, l; in dentary fragment |
| IMNH | 367 | 85005/39202 | 922 | *Satherium piscinarium* | p2, r |
| UMMP | 5 | 45244 | 1004 | *Satherium piscinarium* | rI3, lP3, lM1, lm2, proximal end of second metatarsal |
| UMMP | 3 | 45299 | 912 | *Satherium piscinarium* | dentaries, r and l; edentulous; and rm1 |
| UMMP | 4 | 49562 | 916 | *Satherium piscinarium* | p4, 1l and 1r |
| UMMP | 4 | 49565 | 916 | *Satherium piscinarium* | P4, r |
| UMMP | 168 | 49647 | 936 | *Satherium piscinarium* | dentary, l; edentulous |
| UMMP | 125 | 49938 | 920 | *Satherium piscinarium* | radius, l |
| UMMP | 20 | 50002 | 930 | *Satherium piscinarium* | humerus, r |
| UMMP | 20 | 50003 | 930 | *Satherium piscinarium* | radius, l |
| UMMP | 20 | 50005 | 930 | *Satherium piscinarium* | ulna, l |
| UMMP | 4 | 50090 | 916 | *Satherium piscinarium* | P4, r |
| UMMP | 4 | 50098 | 916 | *Satherium piscinarium* | humerus, r |
| UMMP | 285 | 53422 | 943 | *Satherium piscinarium* | calcaneum, l |
| UMMP | 285 | 53423 | 943 | *Satherium piscinarium* | dentary, r; edentulous; and l humerus |
| UMMP | 37 | 53425 | 911 | *Satherium piscinarium* | skull and dentary |
| UMMP | 207 | 53428 | 959 | *Satherium piscinarium* | dentary, l; edentulous |
| UMMP | 7 | 53611 | 1001 | *Satherium piscinarium* | radius, l; proximal end |
| UMMP | 220 | 53713 | 955 | *Satherium piscinarium* | femora, r; 2 proximal ends |
| UMMP | 277 | 53727 | 926 | *Satherium piscinarium* | femur, l; proximal end |
| UMMP | 277 | 53732 | 926 | *Satherium piscinarium* | dentary, l; with p4-m1 |
| UMMP | 225 | 53741 | 966 | *Satherium piscinarium* | dentary, l; edentulous |
| UMMP | 237 | 53779 | 1000 | *Satherium piscinarium* | dentary, l; edentulous |
| UMMP | 235 | 53908 | 984 | *Satherium piscinarium* | dentary, l; with c and p2-4; and humerus, r |
| UMMP | 262 | 54575 | 990 | *Satherium piscinarium* | ulna, r |
| UMMP | 51 | 54597 | 972 | *Satherium piscinarium* | atlas and lp2 |
| UMMP | 191 | 54720 | 920 | *Satherium piscinarium* | p4, r |
| UMMP | 222 | 55003 | 962 | *Satherium piscinarium* | ulna, l; proximal half |
| UMMP | 52 | 55010 | 974 | *Satherium piscinarium* | tibia, l |
| UMMP | 215 | 55019 | 937 | *Satherium piscinarium* | calcaneum, r |
| UMMP | 55 | 55443 | 966 | *Satherium piscinarium* | radius, l; proximal end |
| UMMP | 256 | 55973 | 975 | *Satherium piscinarium* | p4, l |
| UMMP | 309 | 56284 | 941 | *Satherium piscinarium* | tibia, l |
| UMMP | 258 | 56808 | 942 | *Satherium piscinarium* | dentary, r; edentulous |
| UMMP | 330 | 56810 | 1006 | *Satherium piscinarium* | p2, r |
| UMMP | 21 | 56814 | 921 | *Satherium piscinarium* | p2, l |
| UMMP | 49 | 56988 | 960 | *Satherium piscinarium* | third metacarpal and third metatarsal |
| UMMP | 226 | uncataloged | 960 | *Satherium piscinarium* | dentary, r; with p4-m3 |
| UMMP | 226 | uncataloged | 960 | *Satherium piscinarium* | radius and ulna, l |
| USNM | 1 | 12604 | 1005 | *Satherium piscinarium* | dentaries, r and l; premaxilla; rP4, and distal end of r humerus |
| USNM | 1 | 12605 | 1005 | *Satherium piscinarium* | dentary, r; partial |
| USNM | 1 | 12609 | 1005 | *Satherium piscinarium* | half endocranial cast |
| USNM | 1 | 12610 | 1005 | *Satherium piscinarium* | dentary, r; with p3-m3 |
| UMMP | 5 | 52756 | 1004 | *Sminthosinis bowleri* | dentary, r; with p3-m1 |
| UMMP | 5 | 52868 | 1004 | *Sminthosinis bowleri* | maxilla, r; with I3, C, P1-M1 |
| UMMP | 63 | 53344 | 1001 | *Sminthosinis bowleri* | P4, l |
| UMMP | 7 | 55174 | 1001 | *Sminthosinis bowleri* | M1, r; and m1, l |
| UMMP | 63 | 55214 | 1001 | *Sminthosinis bowleri* | P3-M1, r |
| UMMP | 7 | 55952 | 1001 | *Sminthosinis bowleri* | P4, r |
| UMMP | 7 | 55953 | 1001 | *Sminthosinis bowleri* | M1, l |
| UMMP | 1 | 56025 | 1005 | *Sminthosinis bowleri* | m1, l |
| UMMP | 63 | 53345 | 1001 | *Taxidea* sp. | dentary, l; anterior portion with partial c and p4 |
| HAFO | 246 | 870 | 1032 | *Trigonictis cookii* | ulna, r; olecranon |
| HAFO | 7 | 2913 | 1001 | *Trigonictis cookii* | m1, l |
| HAFO | 424 | 4526 | 927 | *Trigonictis cookii* | dentary, l; with p3-m1 |
| HAFO | 424 | 4527 | 927 | *Trigonictis cookii* | humerus, l; proximal end |
| HAFO | 501 | 5742 | 943 | *Trigonictis cookii* | premaxilla, l and r; edentulous |
| HAFO | 1 | 6688 | 1005 | *Trigonictis cookii* | maxilla, r; with P4 |
| HAFO | 25 | 6797 | 915 | *Trigonictis cookii* | dentary, r; partial |
| HAFO | 220 | 7999 | 955 | *Trigonictis cookii* | dentary, r; edentulous |
| IMNH | 367 | 85005/9973 | 922 | *Trigonictis cookii* | maxillae and premaxillae, r and l; with lP2-M1 and rP2 |
| IMNH | 367 | 85005/9974 | 922 | *Trigonictis cookii* | maxillae and premaxillae, r and l; with lP2-M1 and rP3 |
| IMNH | 3 | 65006/35140 | 912 | *Trigonictis cookii* | dentary, r; with p2-m2 |
| UMMP | 117 | 54659 | 894 | *Trigonictis cookii* | P4, l |
| UMMP | 318 | 55514 | 880 | *Trigonictis cookii* | dentary, l; with p2-m1 |
| UMMP | 330 | 56165 | 1006 | *Trigonictis cookii* | dentary, l; edentulous |
| UMMP | 3 | 56807 | 912 | *Trigonictis cookii* | M1, r |
| HAFO | 25 | 749 | 915 | *Trigonictis macrodon* | dentary, l; edentulous |
| HAFO | 68 | 6527 | 923 | *Trigonictis macrodon* | c1; tip broken |
| HAFO | 485 | 7983 | 950 | *Trigonictis macrodon* | m1, r; partial |
| IMNH | 50 | 70058/5349 | 955 | *Trigonictis macrodon* | dentary, l; edentulous |
| IMNH | 68 | 80005/5440 | 923 | *Trigonictis macrodon* | dentary, r; edentulous |
| IMNH | 4 | 67002/8125 | 916 | *Trigonictis macrodon* | dentary, l; edentulous |
| IMNH | 367 | 85005/38647 | 922 | *Trigonictis macrodon* | dentary, r; with c-m1 |
| UMMP | 3 | 45304 | 912 | *Trigonictis macrodon* | maxilla, r |
| UMMP | 104 | 48862 | 900 | *Trigonictis macrodon* | dentary, r; with p2-m1 |
| UMMP | 123 | 48863 | 932 | *Trigonictis macrodon* | dentary, r; with p2-m1 |
| UMMP | 4 | 49566 | 916 | *Trigonictis macrodon* | P4, l |
| UMMP | 103 | 49646 | 893 | *Trigonictis macrodon* | dentary, r; with p4-m3 |
| UMMP | 162 | 49649 | 990 | *Trigonictis macrodon* | dentaries, r and l |
| UMMP | 149 | 49654 | 968 | *Trigonictis macrodon* | dentary, r; with p4-m1 |
| UMMP | 149 | 49655 | 968 | *Trigonictis macrodon* | dentary, r; with p4 |
| UMMP | 156 | 49657 | 966 | *Trigonictis macrodon* | dentary, r; edentulous |
| UMMP | 117 | 49659 | 918 | *Trigonictis macrodon* | dentary, l; edentulous |
| UMMP | 117 | 49660 | 918 | *Trigonictis macrodon* | dentary, r; with m1 |
| UMMP | 117 | 49661 | 918 | *Trigonictis macrodon* | dentary, l; with m1 |
| UMMP | 136 | 49662 | 943 | *Trigonictis macrodon* | dentary, l; with p3-4 |
| UMMP | 136 | 49663 | 943 | *Trigonictis macrodon* | dentary, l; edentulous |
| UMMP | 100 | 49728 | 963 | *Trigonictis macrodon* | P4, l |
| UMMP | 100 | 49729 | 963 | *Trigonictis macrodon* | maxilla, r; with P3 |
| UMMP | 170 | 50253 | 936 | *Trigonictis macrodon* | ulna, l |
| UMMP | 104 | 50739 | 900 | *Trigonictis macrodon* | femur, r; distal end |
| UMMP | 128 | 51049 | 937 | *Trigonictis macrodon* | humerus, r; distal end |
| UMMP | 136 | 51376 | 943 | *Trigonictis macrodon* | humerus, r; distal end |
| UMMP | 34 | 53273 | 954 | *Trigonictis macrodon* | M1, l |
| UMMP | 258 | 53547 | 942 | *Trigonictis macrodon* | dentary, l; partial |
| UMMP | 261 | 53554 | 997 | *Trigonictis macrodon* | humerus, l; distal end |
| UMMP | 180 | 53556 | 899 | *Trigonictis macrodon* | humerus, l; distal end |
| UMMP | 141 | 54821 | 945 | *Trigonictis macrodon* | dentary, r; with m1 talonid |
| UMMP | 287 | 54997 | 931 | *Trigonictis macrodon* | dentary, r; with c, p3-m2 |
| UMMP | 243 | 55001 | 1012 | *Trigonictis macrodon* | humerus, r; distal end |
| UMMP | 189 | 55005 | 932 | *Trigonictis macrodon* | humerus, r; partial |
| UMMP | 177 | 55009 | 894 | *Trigonictis macrodon* | tibia, r |
| UMMP | 7 | 55951 | 1001 | *Trigonictis macrodon* | P4, l |
| UMMP | 3 | 56070 | 912 | *Trigonictis macrodon* | P4, l |
| UMMP | 220 | 56082 | 955 | *Trigonictis macrodon* | dentary, r; with m1 |
| UMMP | 339 | 56096 | 969 | *Trigonictis macrodon* | tibia, l |
| UMMP | 331 | 56201 | 1006 | *Trigonictis macrodon* | dP3, l |
| UMMP | 220 | 56929 | 955 | *Trigonictis macrodon* | dentary, r; with p2-m1 |
| HAFO | 390 | 3817 | 948 | *Ursus abstrusus* | m1, r; partial |
| UMMP | 26 | 49950 | 26 | *Ursus abstrusus* | humerus, l; distal half |
| UMMP | 231 | 53419 | 231 | *Ursus abstrusus* | dentary, r; with m1 |
| HAFO | 599 | 17884 | 937 | *Agriotherium* cf. *A. schneideri* | dentary, l; with p4-m2 |

Abbreviations: l, left; r, right; c, lower canine; C, upper canine; dP, decidous upper premolar;
i, lower incisor; I, upper incisor; p, lower premolar; P, upper premolar; m, lower molar; M, upper molar; Inst., institutional abbreviation; Loc. No., HAFO locality number; Spec. No., specimen number; Elev., elevation (meters amsl) on HHQ datum sensu Ruez [2]. Institutional abbreviations: HAFO, Hagerman Fossil Beds National Monument; IMNH, Idaho Museum of Natural History; UMMP, University of Michigan Museum of Paleontology; USNM, United States National Museum. Specimens without locality data are not listed here and were not included in this study. Specimens without a HAFO locality number listed have locality data on file with the respective institution.
